# Supplementary material for: Physicochemical and electrochemical properties of a new series of protic ionic liquids with N-chloroalkyl functionalized cations
Source: Royal Society of Chemistry journal article supplement (doi:10.1039/c6ra12152g), 2016-01-01
Supplement: c6ra12152g1.pdf [file c6ra12152g1.pdf]

## Electronic Supplementary Information

### Physicochemical and electrochemical properties of a new series of protic ionic liquids with N-chloroalkyl functionalized cations

*B. Gorska,<sup>a</sup> L. Timperman,<sup>b</sup> M. Anouti,<sup>b</sup> J. Pernak,<sup>a</sup> and F. Béguin,<sup>a\*</sup>*

**Table S1:** Structure, abbreviation and Cosmo volume of the TFSI anion and the studied cations and their non-chlorinated analogues.

| Structure<br>and abbreviation                                                                                              | Cosmo Volume<br>(Å <sup>3</sup> )                                                             | Structure<br>and abbreviation                                                                                                   | Cosmo Volume<br>(Å <sup>3</sup> )                                                               |
|----------------------------------------------------------------------------------------------------------------------------|-----------------------------------------------------------------------------------------------|---------------------------------------------------------------------------------------------------------------------------------|-------------------------------------------------------------------------------------------------|
| 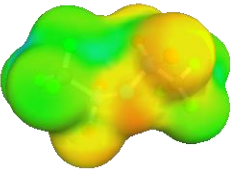<br>[TFSI] <sup>-</sup> conformer 1       | <br>219.69   | <br>[TFSI] <sup>-</sup> conformer 2           | <br>222.21   |
| <br>[C <sub>2</sub> Morph] <sup>+</sup> | <br>159.75 | <br>[C <sub>2-cl</sub> .Morph] <sup>+</sup> | <br>182.91 |
| <br>[C <sub>2</sub> Pip] <sup>+</sup>   | <br>170.25 | <br>[C <sub>2-cl</sub> .Pip] <sup>+</sup>   | <br>191.74 |
| <br>[C <sub>2</sub> Pyrr] <sup>+</sup>  | <br>150.86 | <br>[C <sub>2-cl</sub> .Pyrr] <sup>+</sup>  | <br>174.11 |

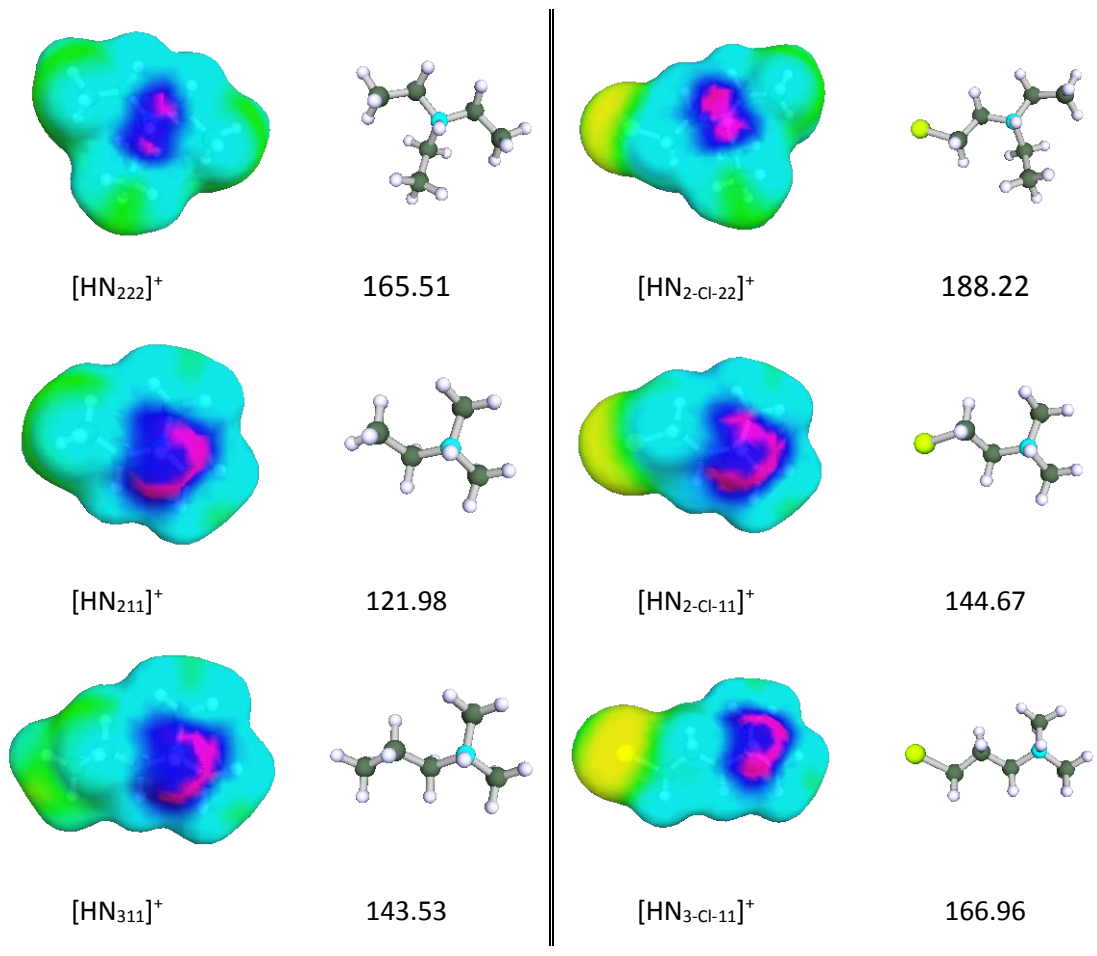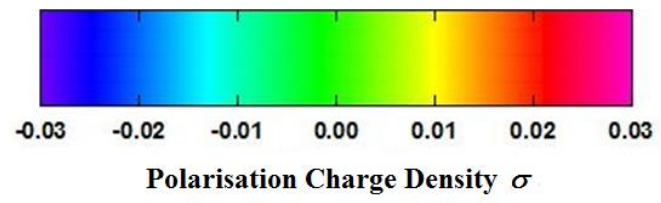

a, [TFSI]<sup>-</sup> conformer 1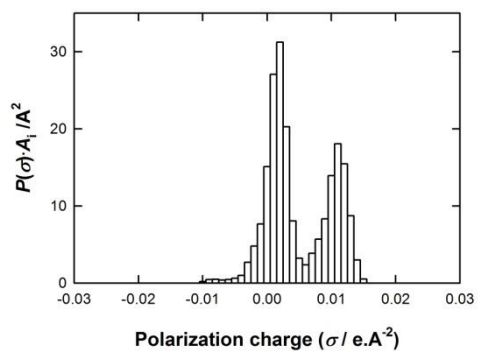b, [TFSI]<sup>-</sup> conformer 2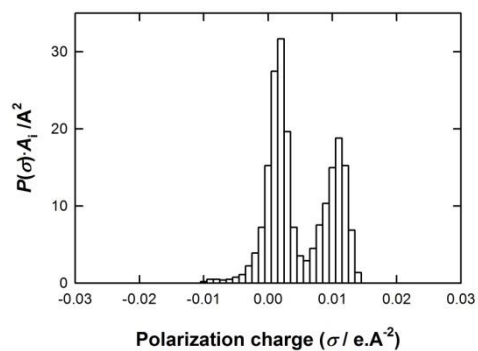c, [C<sub>2</sub>Morph]<sup>+</sup>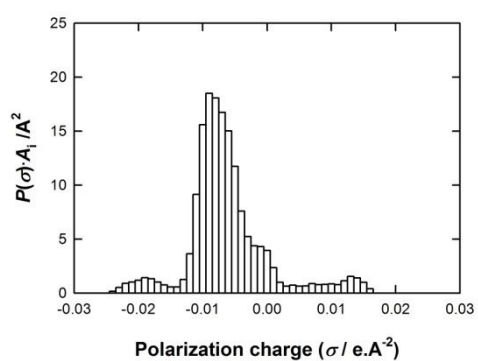d, [C<sub>2-Cl</sub>-Morph]<sup>+</sup>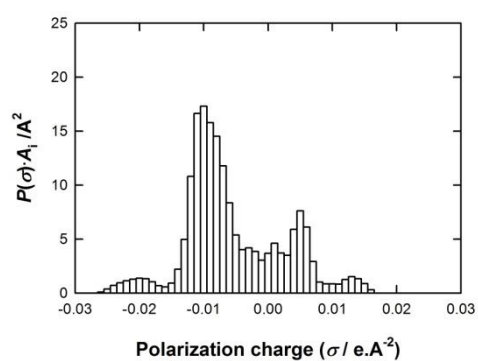e, [C<sub>2</sub>Pip]<sup>+</sup>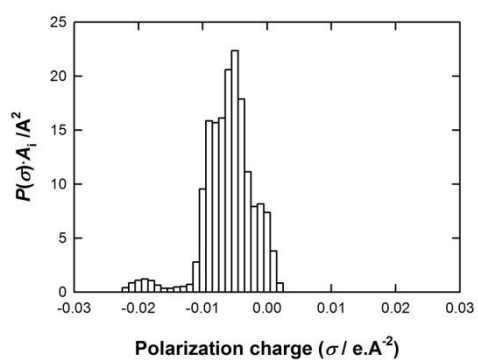f, [C<sub>2-Cl</sub>-Pip]<sup>+</sup>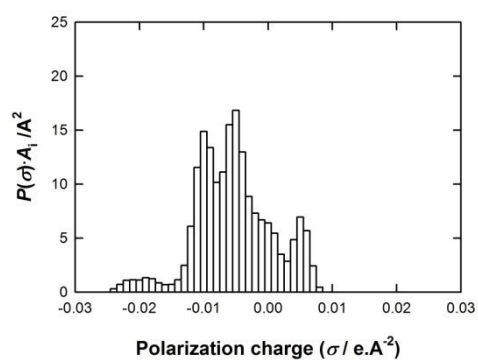

g, [C<sub>2</sub>Pyrr]<sup>+</sup>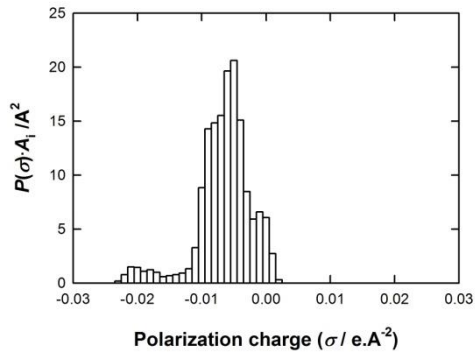h, [C<sub>2</sub>-Cl-Pyrr]<sup>+</sup>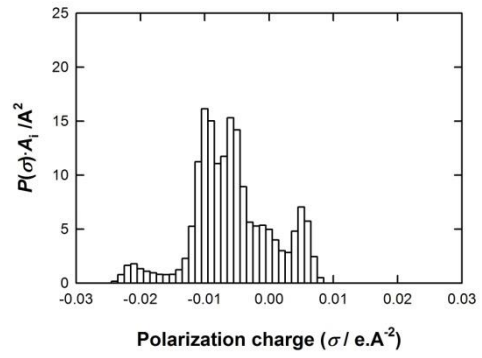i, [HN<sub>222</sub>]<sup>+</sup>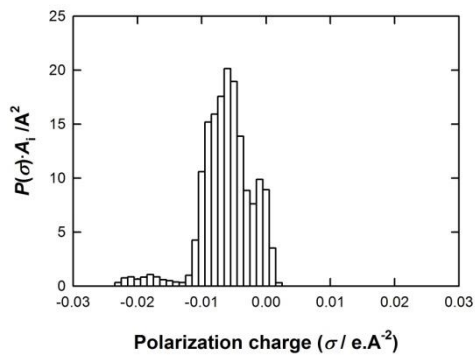j, [HN<sub>2</sub>-Cl-22]<sup>+</sup>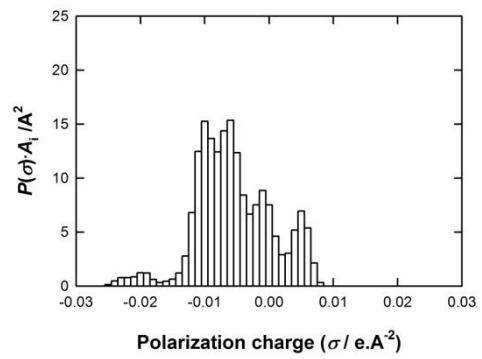k, [HN<sub>211</sub>]<sup>+</sup>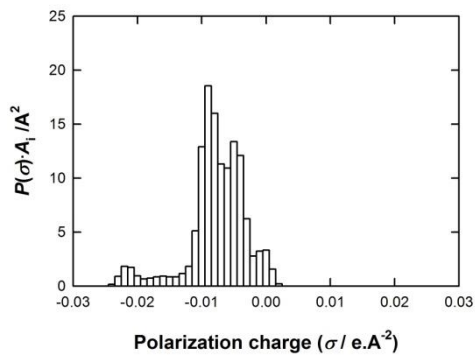l, [HN<sub>2</sub>-Cl-11]<sup>+</sup>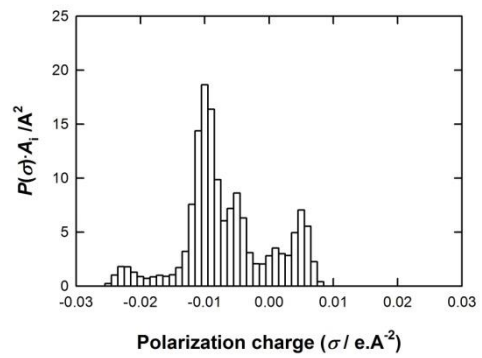

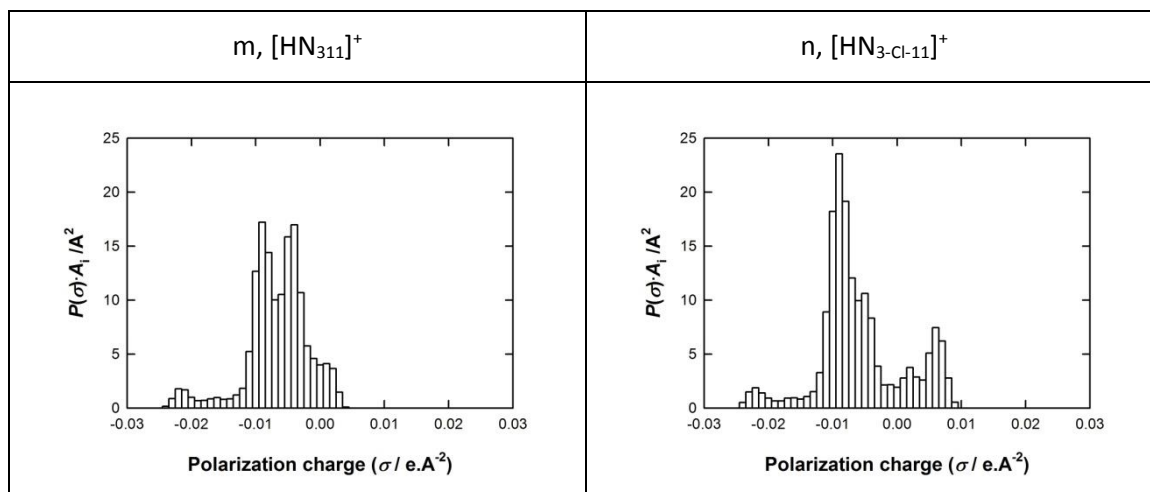

**Figure S1.** Sigma profiles of the TFSI anion and of the studied cations and their non-chlorinated analogues.

**Table S2.** Thermal decomposition parameters of the N-chloroalkyl functionalized PILs.

| PILs                             | $T_{5\%onset}$<br>(°C) | Observed mass loss<br>(%) | Calculated mass loss <sup>(a)</sup><br>(%) |
|----------------------------------|------------------------|---------------------------|--------------------------------------------|
| [C <sub>2</sub> -Cl-Morph][TFSI] | 280                    | 16                        | 15                                         |
| [C <sub>2</sub> -Cl-Pip][TFSI]   | 314                    | 10                        | 15                                         |
| [C <sub>2</sub> -Cl-Pyrr][TFSI]  | 315                    | 12                        | 15                                         |
| [HN <sub>2</sub> -Cl-22][TFSI]   | 306                    | 16                        | 15                                         |
| [HN <sub>2</sub> -Cl-11][TFSI]   | 305                    | 17                        | 16                                         |
| [HN <sub>3</sub> -Cl-11][TFSI]   | 337                    | 14                        | 16                                         |

<sup>(a)</sup> Calculated mass loss corresponding to the elimination of chloroethane ( $M_{\text{chloroethane}}=62.5 \text{ g}\cdot\text{mol}^{-1}$  divided by  $M_w$  of the tested PILs).

**Table S3:** Energy of HOMO and LUMO orbitals and their isosurface projection for N-chloroalkyl functionalized cations and their alkyl functionalized analogues.

| HOMO Orbital<br>Energy (eV)                                                         | LUMO Orbital<br>Energy (eV)                                                         | HOMO Orbital<br>Energy (eV)                                                          | LUMO Orbital<br>Energy (eV)                                                           |
|-------------------------------------------------------------------------------------|-------------------------------------------------------------------------------------|--------------------------------------------------------------------------------------|---------------------------------------------------------------------------------------|
| [C <sub>2</sub> Morph] <sup>+</sup>                                                 |                                                                                     | [C <sub>2</sub> -Cl-Morph] <sup>+</sup>                                              |                                                                                       |
| 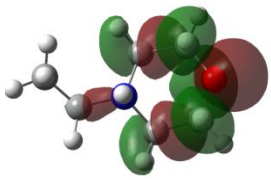   |    |    |    |
| -11.79                                                                              | -3.63                                                                               | -11.92                                                                               | -4.32                                                                                 |
| [C <sub>2</sub> Pip] <sup>+</sup>                                                   |                                                                                     | [C <sub>2</sub> -Cl-Pip] <sup>+</sup>                                                |                                                                                       |
|    |    |    |    |
| -13.35                                                                              | -3.24                                                                               | -11.88                                                                               | -4.07                                                                                 |
| [C <sub>2</sub> Pyrr] <sup>+</sup>                                                  |                                                                                     | [C <sub>2</sub> -Cl-Pyrr] <sup>+</sup>                                               |                                                                                       |
|  |  |  |  |
| -13.76                                                                              | -3.70                                                                               | -11.93                                                                               | -4.21                                                                                 |
| [HN <sub>222</sub> ] <sup>+</sup>                                                   |                                                                                     | [HN <sub>2</sub> -Cl-22] <sup>+</sup>                                                |                                                                                       |
|  |  |  |  |
| -14.27                                                                              | -3.27                                                                               | -11.93                                                                               | -3.96                                                                                 |

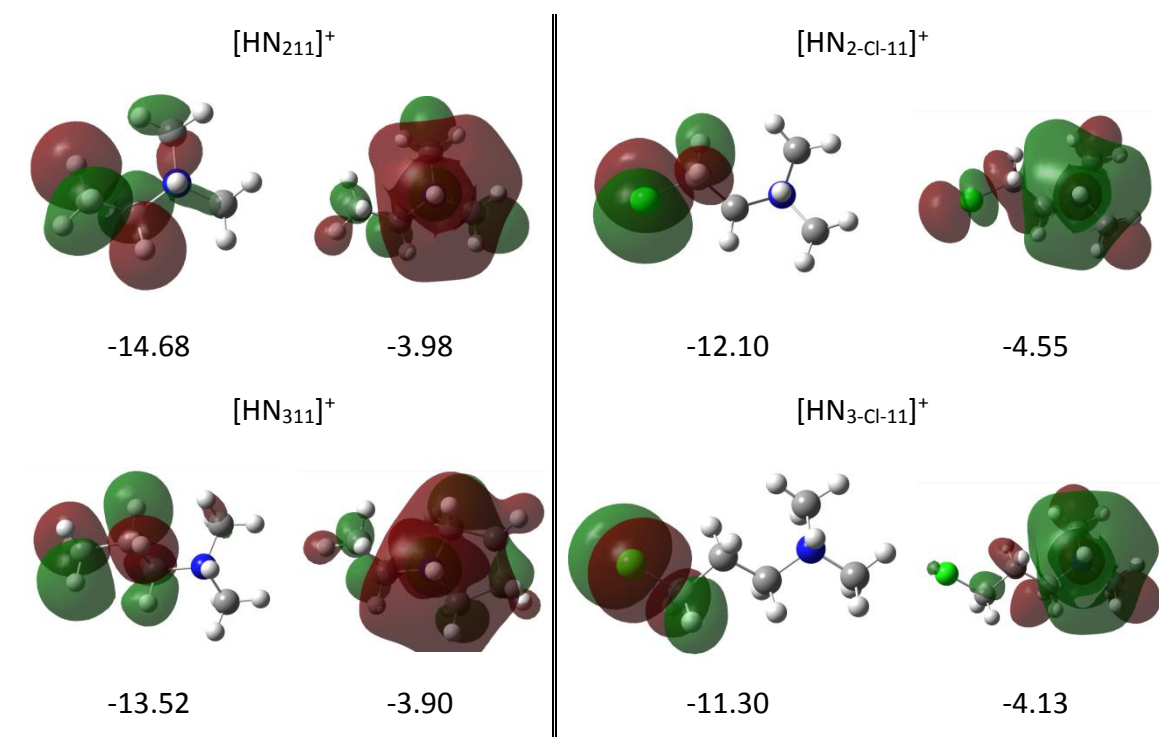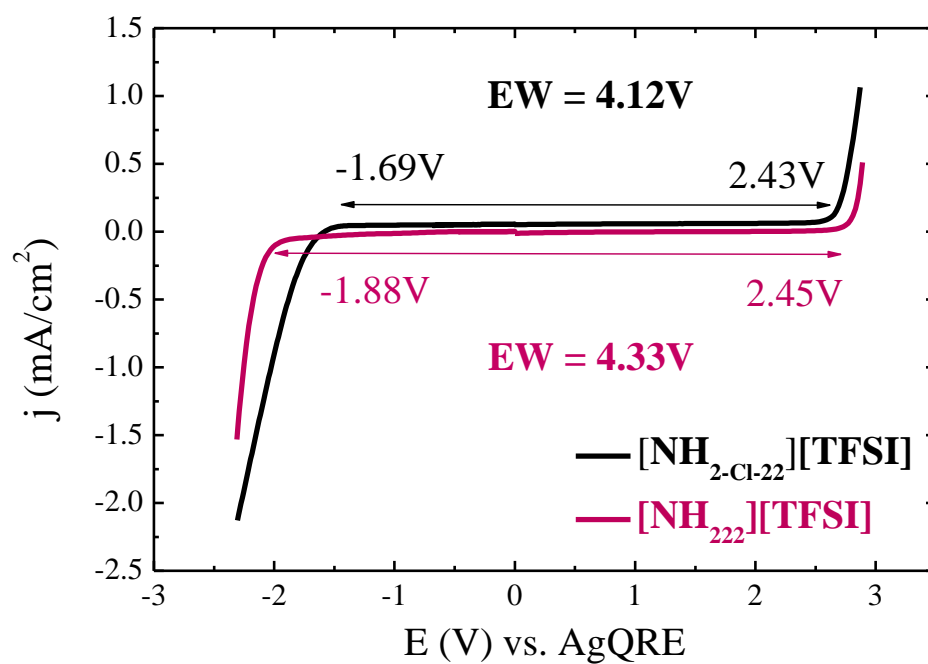

**Figure S2.** Comparison of electrochemical stability on glassy carbon electrode for  $[\text{HN}_{2-\text{Cl}-22}][\text{TFSI}]$  and  $[\text{HN}_{222}][\text{TFSI}]$  PILs ( $v = 10 \text{ mV}\cdot\text{s}^{-1}$ ).
